# Supplementary material for: Fecal microbiota transplantation in systemic sclerosis: A double-blind, placebo-controlled randomized pilot trial
Source: PubMed Central journal article supplement (PMC7241803; doi:10.1371/journal.pone.0232739), 2020-05-21

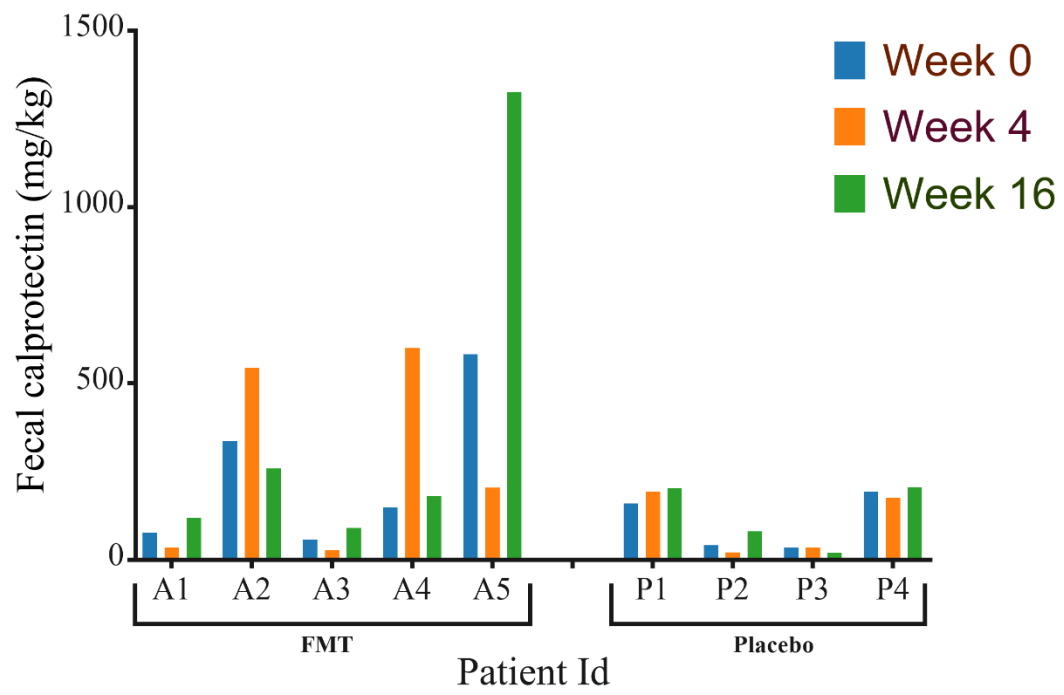

Supplement: pone.0232739.s008.pdf [file pone.0232739.s008.pdf]
